# Supplementary figures and images for: Effect of the Combination of Phosphate-Solubilizing Bacteria with Orange Residue-Based Activator on the Phytoremediation of Cadmium by Ryegrass
Source: MDPI journal article supplement (doi:10.3390/plants12142727), 2023-07-22

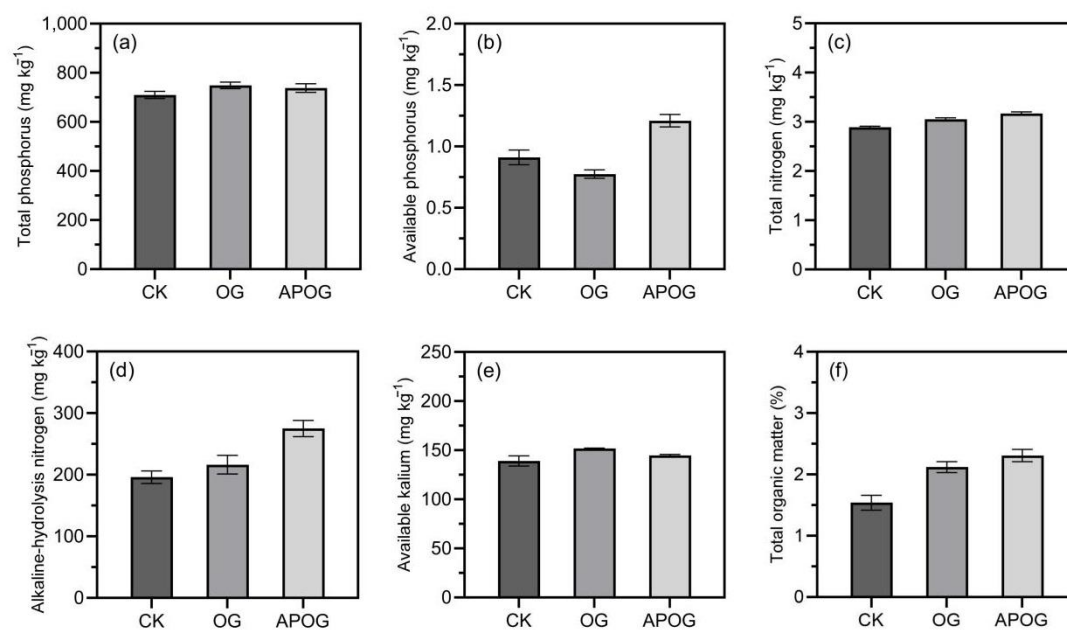

**Figure S1.** Changes of nutrient elements in different treatments.

Supplement: s1 [file s1]
